# Supplementary material
Source: Springer Nature journal article supplement (https://www.springermedizin.de/resource/supplementary/12885_2010_2609_MOESM5_ESM.pdf/9461560)

### LTX-302

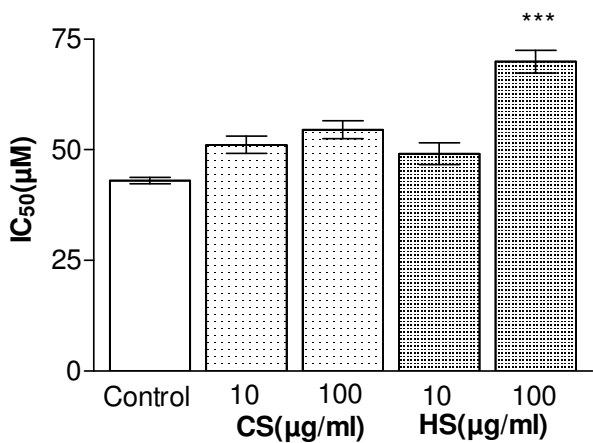

### LTX-315

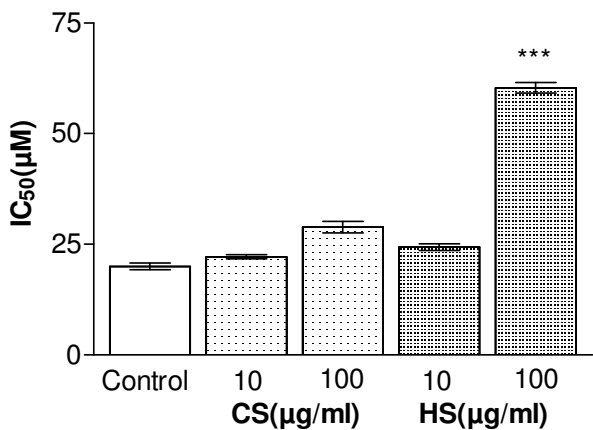

### LTX-318

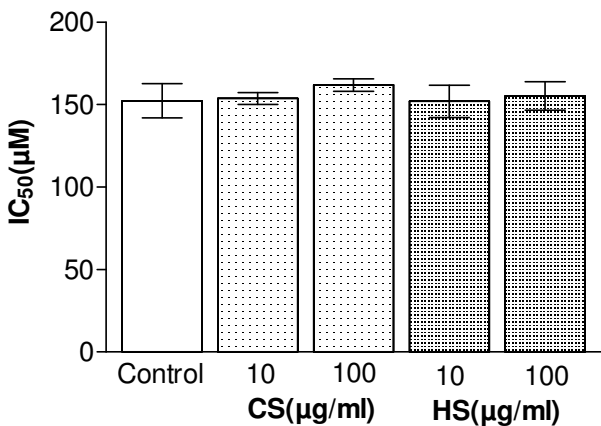

Supplement: MOESM5 [file 9461560]
